# Supplementary material
Source: Research Square preprint supplement (doi:10.21203/rs.3.rs-9035718/v1)
Supplement: Supplementary file 1 [file 83b085f0535dcd2b02cab23e.docx]

| **Supplementary Table S1. Univariate Analysis of Factors Associated With Insomnia-Related Worry** | | | | |
| --- | --- | --- | --- | --- |
| **Variable** | **Category** | **Mean ± SD** | **t/F** | **P value** |
| **Sex** | Male | 14.94 ± 5.54 | 0.937 | 0.333 |
|  | Female | 14.33 ± 4.79 | 0.937 | 0.333 |
| **Age (years)** | <30 | 14.16 ± 4.46 | 0.355 | 0.701 |
|  | 30–40 | 14.61 ± 5.13 | 0.355 | 0.701 |
|  | >40 | 14.33 ± 4.98 | 0.355 | 0.701 |
| **Ethnicity** | Han | 14.38 ± 4.67 | 0.083 | 0.774 |
|  | Non-Han | 14.52 ± 5.37 | 0.083 | 0.774 |
| **Number of Children** | 0 | 14.15 ± 4.46 | 0.648 | 0.585 |
|  | 1 | 14.77 ± 5.36 | 0.648 | 0.585 |
|  | 2 | 14.40 ± 4.80 | 0.648 | 0.585 |
|  | ≥3 | 13.28 ± 5.12 | 0.648 | 0.585 |
| **Hospital Level** | Tertiary Grade A | 14.65 ± 5.02 | 1.182 | 0.318 |
|  | Tertiary Grade B | 13.77 ± 4.66 | 1.182 | 0.318 |
|  | Secondary Grade A | 14.60 ± 4.83 | 1.182 | 0.318 |
|  | Secondary Grade B | 15.37 ± 5.01 | 1.182 | 0.318 |
|  | Other | 13.37 ± 5.08 | 1.182 | 0.318 |
| **Hospital Type** | General hospital | 14.38 ± 4.73 | 1.054 | 0.368 |
|  | Specialty hospital | 15.41 ± 5.60 | 1.054 | 0.368 |
|  | Traditional Chinese Medicine hospital | 13.84 ± 5.41 | 1.054 | 0.368 |
|  | Other | 16.66 ± 8.14 | 1.054 | 0.368 |
| **Ownership** | Public hospital | 14.45 ± 4.96 | 1.367 | 0.256 |
|  | Private hospital | 13.45 ± 4.12 | 1.367 | 0.256 |
|  | Other | 16.00 ± 5.24 | 1.367 | 0.256 |
| **Education Level** | Secondary or junior college | 14.23 ± 5.28 | 1.769 | 0.172 |
|  | Bachelor’s degree | 14.50 ± 4.88 | 1.769 | 0.172 |
|  | Master’s degree or above | 10.40 ± 1.14 | 1.769 | 0.172 |
| **Marital Status** | Unmarried | 14.71 ± 4.61 | 1.192 | 0.305 |
|  | Married | 14.29 ± 4.99 | 1.192 | 0.305 |
|  | Divorced/Widowed | 16.75 ± 5.47 | 1.192 | 0.305 |
| **Employment Type** | Contract nurse | 14.16 ± 4.68 | 2.954 | 0.053 |
|  | Permanent hospital staff | 15.34 ± 5.53 | 2.954 | 0.053 |
|  | Labor dispatch | 12.00 ± 4.00 | 2.954 | 0.053 |
| **Years of Service** | <5 | 13.97 ± 5.07 | 0.558 | 0.694 |
|  | 5–10 | 14.40 ± 4.37 | 0.558 | 0.694 |
|  | >10 | 14.62 ± 5.14 | 0.558 | 0.694 |
| **Professional Title** | Nurse | 13.78 ± 5.10 | 0.612 | 0.506 |
|  | Senior nurse | 14.49 ± 4.80 | 0.612 | 0.506 |
|  | Supervisor nurse | 14.36 ± 5.11 | 0.612 | 0.506 |
|  | Associate chief nurse or above | 15.28 ± 4.25 | 0.612 | 0.506 |
| **Job Satisfaction** | Very satisfied | 13.53 ± 4.53 | 13.172 | <0.001 |
|  | Moderate | 15.92 ± 5.19 | 13.172 | <0.001 |
|  | Dissatisfied | 12.00 ± 5.65 | 13.172 | <0.001 |
| **Position Category** | Clinical nurse | 14.41 ± 4.95 | 0.024 | 0.877 |
|  | Nursing manager | 14.52 ± 4.76 | 0.024 | 0.877 |
| **Monthly Night Shift (Yes/No)** | Yes | 15.00 ± 5.52 | 6.014 | 0.015 |
|  | No | 13.86 ± 4.51 | 6.014 | 0.015 |
| **Monthly Night Shift Frequency** | 0–5 | 14.94 ± 5.51 | 2.2 | 0.087 |
|  | 6–10 | 15.17 ± 4.69 | 2.2 | 0.087 |
|  | >10 | 14.07 ± 7.23 | 2.2 | 0.087 |
| **Weekly Overtime (hours)** | None | 13.25 ± 4.41 | 9.094 | <0.001 |
|  | <10 | 15.03 ± 4.68 | 9.094 | <0.001 |
|  | 10–20 | 16.16 ± 6.94 | 9.094 | <0.001 |
|  | >20 | 18.13 ± 6.65 | 9.094 | <0.001 |
| **Workplace Violence (Past Year)** | Yes | 16.10 ± 5.80 | 1.177 | 0.279 |
|  | No | 14.39 ± 4.90 | 1.177 | 0.279 |
| **Electronic Device Use Before Sleep** | Yes | 14.69 ± 4.97 | 7.109 | 0.008 |
|  | No | 13.00 ± 4.42 | 7.109 | 0.008 |
| **Coffee or Tea Consumption Habit** | Yes | 14.89 ± 5.15 | 1.784 | 0.182 |
|  | No | 14.21 ± 4.80 | 1.784 | 0.182 |
| **Diagnosed Anxiety or Depression** | Yes | 18.26 ± 4.92 | 26.644 | <0.001 |
|  | No | 14.07 ± 4.77 | 26.644 | <0.001 |
| **Self-Rated Health Status** | Good | 13.30 ± 4.23 | 42.273 | <0.001 |
|  | Fair | 17.09 ± 5.14 | 42.273 | <0.001 |
|  | Poor | 23.50 ± 6.50 | 42.273 | <0.001 |

| **Supplementary Table S2.Multiple Linear Regression Analysis of Factors Associated With Athens Insomnia Scale Score** | |
| --- | --- |
| **Variable** | **Coding Method** |
| Monthly night shift frequency | 1–5 = 1; 6–10 = 2; >10 = 3 |
| Weekly overtime hours | None = 0; <10 = 1; 10–20 = 2; >20 = 3 |
| Self-rated health status | Good = 1; Fair = 2; Poor = 3 |
| Current job satisfaction | Very satisfied = 1; Moderate = 2; Dissatisfied = 3 |
